# Supplementary material for: Differing contribution of methotrexate polyglutamates to adalimumab blood levels as compared with etanercept
Source: PubMed Central journal article supplement — Ann Rheum Dis. 2019 Mar 18;78(9):1285–6. doi: 10.1136/annrheumdis-2018-214860 (PMC6788881; doi:10.1136/annrheumdis-2018-214860), 2019-03-18
Supplement: annrheumdis-2018-214860supp001.pdf [file annrheumdis-2018-214860supp001.pdf]

**SUPPLEMENTARY MATERIALS****THE IMPACT TRIAL: INVESTIGATING METHOTREXATE POLYGLUTAMATE ASSESSMENTS IN COMBINATION THERAPY****DIFFERING CONTRIBUTION OF METHOTREXATE POLYGLUTAMATE TO ADALIMUMAB STEADY STATE LEVELS AS COMPARED TO ETANERCEPT**Thierry Dervieux<sup>1</sup>, Joel Kremer<sup>2</sup>, Michael Weinblatt<sup>3</sup><sup>1</sup>Exagen, Vista, CA; <sup>2</sup>The Center for Rheumatology, Albany, NY;<sup>3</sup>Brigham and Women Hospital, Boston, MA.**Supplementary Table I:** Patient demographics.

All patients enrolled received MTX in combination with anti-TNFs therapy for at least three months.

|                                                       | MTX +<br>Adalimumab | MTX +<br>Etanercept |
|-------------------------------------------------------|---------------------|---------------------|
| <b>Number of patients</b>                             | 83                  | 86                  |
| <b>Age (years)</b>                                    | 58±1                | 59±1                |
| <b>Gender (% female)</b>                              | 82%                 | 86%                 |
| <b>Obese (BMI&gt;30 Kg/m<sup>2</sup>)</b>             | 37%                 | 41%                 |
| <b>Disease duration (years)</b>                       | 8±1                 | 12±1                |
| <b>Anti-TNF dose [mg/week]</b>                        | 21±1                | 49±1                |
| <b>Duration of TNF [months]</b>                       | 83±4                | 86±5                |
| <b>Previous anti-TNF [%]</b>                          | 22%                 | 12%                 |
| <b>Anti-TNF levels [µg/ml]</b>                        | 11.8±0.8            | 3.2±0.2             |
| <b>Undetectable anti-TNF blood levels<sup>1</sup></b> | 3.6%                | 0.0%                |
| <b>MTX dose [mg/week]</b>                             | 16.7±0.7            | 16.4±0.6            |
| <b>Duration of MTX [months]</b>                       | 95±8                | 109±8               |
| <b>Short chain MTXPG<sub>1-2</sub> [nmol/L]</b>       | 40±3                | 48±4                |
| <b>Long chain MTXPG<sub>3</sub> [nmol/L]</b>          | 38±2                | 39±4                |
| <b>Very long chain MTXPG<sub>4-5</sub> [nmol/L]</b>   | 14±2                | 14±2                |
| <b>DAS 28</b>                                         | 2.8±0.2             | 2.7±0.2             |
| <b>DAS 28 remission (DAS28&lt;2.6)</b>                | 43%                 | 44%                 |
| <b>CRP [mg/dl]</b>                                    | 7.0±0.4             | 9.0±0.9             |

Results are expressed as mean [SEM], or percentage, as appropriate. Lower limit of quantification is 0.65 µg/ml for infliximab and adalimumab, and 0.1 µg/ml for etanercept.

**Supplementary Table II:** RBC short chain, long chain and very long chain MTXPG levels and steady state levels for adalimumab as compared to etanercept.

|                                      | MTX + Adalimumab                     | MTX + Etanercept         |
|--------------------------------------|--------------------------------------|--------------------------|
| Short chain MTXPG <sub>1-2</sub>     | 0.042±0.029<br>(p=0.16)              | 0.004±0.007<br>(p=0.50)  |
| Long chain MTXPG <sub>3</sub>        | 0.074±0.029 <sup>a</sup><br>(p=0.01) | -0.008±0.010<br>(p=0.44) |
| Very-long chain MTXPG <sub>4-5</sub> | 0.071±0.036<br>(p=0.05)              | -0.017±0.013<br>(p=0.22) |

All estimates are adjusted for anti-TNF dosage (mg per week), CRP (mg/dl), obese status (BMI>30 Kg/m<sup>2</sup>), disease duration (years) and previous anti-TNFs treatment, as described in **Table I**. <sup>a</sup>Each unit in RBC MTXPG<sub>3</sub> (expressed as nmol/L) was associated with 0.07 units higher adalimumab levels (expressed as µg/ml). MTXPG: methotrexate polyglutamate.
